# Supplementary material
Source: publisher figshare collection journal article supplement (https://frontiersin.figshare.com/ndownloader/files/26479313)
Supplement: Supplementary file [file 26479313]

Table 2

| Exploration session<br>(Brain Region) | Metric                                   | Time-Window<br>ANOVA Statistics | Paired t-test against 0         |
|---------------------------------------|------------------------------------------|---------------------------------|---------------------------------|
| Open Field 1 (HC)                     | Delta/beta2 MI time<br>window comparison | $F_{3,8} = 5.67, p = 0.004$     | Win1 - $t_{2,8}=3.13, p= 0.018$ |
|                                       |                                          |                                 | Win2 - $t_{2,8}=3.56, p= 0.014$ |
|                                       |                                          |                                 | Win3 - $t_{2,8}=3.82, p= 0.014$ |
|                                       |                                          |                                 | Win4 - $t_{2,8}=2.91, p= 0.019$ |
| Open Field 1 (HC)                     | Delta/lowG MI time<br>window comparison  | $F_{3,8} = 3.69, p = 0.025$     | Win1 - $t_{2,8}=3.72, p= 0.011$ |
|                                       |                                          |                                 | Win2 - $t_{2,8}=4.03, p= 0.011$ |
|                                       |                                          |                                 | Win3 - $t_{2,8}=3.08, p= 0.019$ |
|                                       |                                          |                                 | Win4 - $t_{2,8}=2.87, p= 0.020$ |
| Open Field 1 (HC)                     | Theta/beta2 MI time<br>window comparison | $F_{3,8} = 7.33, p = 0.001$     | Win1 - $t_{2,8}=4.97, p= 0.004$ |
|                                       |                                          |                                 | Win2 - $t_{2,8}=4.17, p= 0.006$ |
|                                       |                                          |                                 | Win3 - $t_{2,8}=3.47, p= 0.011$ |
|                                       |                                          |                                 | Win4 - $t_{2,8}=1.74, p= 0.12$  |
| Open Field 1 (HC)                     | Theta/lowG MI time<br>window comparison  | $F_{3,8} = 8.51, p = 0.0004$    | Win1 - $t_{2,8}=4.85, p= 0.002$ |
|                                       |                                          |                                 | Win2 - $t_{2,8}=4.47, p= 0.002$ |
|                                       |                                          |                                 | Win3 - $t_{2,8}=4.74, p= 0.002$ |
|                                       |                                          |                                 | Win4 - $t_{2,8}=3.80, p= 0.005$ |
| Open Field 1 (HC)                     | Theta/midG MI time<br>window comparison  | $F_{3,6} = 1.74, p = 0.18$      | Win1 - $t_{2,8}=3.01, p= 0.020$ |
|                                       |                                          |                                 | Win2 - $t_{2,8}=2.96, p= 0.021$ |
|                                       |                                          |                                 | Win3 - $t_{2,8}=4.74, p= 0.021$ |
|                                       |                                          |                                 | Win4 - $t_{2,8}=2.93, p= 0.021$ |
| Object 1 (HC)                         | Delta/beta2 MI time<br>window comparison | $F_{3,6} = 2.53, p = 0.08$      | Win1 - $t_{2,8}=2.78, p= 0.027$ |
|                                       |                                          |                                 | Win2 - $t_{2,8}=2.62, p= 0.034$ |
|                                       |                                          |                                 | Win3 - $t_{2,8}=2.97, p= 0.027$ |
|                                       |                                          |                                 | Win4 - $t_{2,8}=3.28, p= 0.013$ |
| Object 1 (HC)                         | Delta/lowG MI time<br>window comparison  | $F_{3,6} = 1.44, p = 0.25$      | Win1 - $t_{2,8}=6.98, p= 0.001$ |
|                                       |                                          |                                 | Win2 - $t_{2,8}=5.20, p= 0.005$ |
|                                       |                                          |                                 | Win3 - $t_{2,8}=3.31, p= 0.021$ |
|                                       |                                          |                                 | Win4 - $t_{2,8}=3.11, p= 0.017$ |
| Object 1 (HC)                         | Theta/beta2 MI time<br>window comparison | $F_{3,6} = 3.83, p = 0.02$      | Win1 - $t_{2,8}=3.75, p= 0.007$ |
|                                       |                                          |                                 | Win2 - $t_{2,8}=3.07, p= 0.017$ |
|                                       |                                          |                                 | Win3 - $t_{2,8}=2.28, p= 0.056$ |
|                                       |                                          |                                 | Win4 - $t_{2,8}=3.13, p= 0.016$ |
| Object 1 (HC)                         | Theta/lowG MI time<br>window comparison  | $F_{3,6} = 4.13, p = 0.01;$     | Win1 - $t_{2,8}=5.36, p= 0.001$ |
|                                       |                                          |                                 | Win2 - $t_{2,8}=4.24, p= 0.003$ |
|                                       |                                          |                                 | Win3 - $t_{2,8}=5.11, p= 0.001$ |
|                                       |                                          |                                 | Win4 - $t_{2,8}=3.61, p= 0.008$ |
| Object 1 (HC)                         | Theta/midG MI time<br>window comparison  | $F_{3,6} = 0.40, p = 0.74$      | Win1 - $t_{2,8}=4.03, p= 0.002$ |
|                                       |                                          |                                 | Win2 - $t_{2,8}=2.37, p= 0.030$ |
|                                       |                                          |                                 | Win3 - $t_{2,8}=2.51, p= 0.028$ |
|                                       |                                          |                                 | Win4 - $t_{2,8}=3.35, p= 0.008$ |

Table 2 – Table of statistics related to figure 2. Descriptive statistics and comparisons with different MI time window analysis and the comparison with null hypothesis 0. Black: Significant p values, Red: non-significant p values.
